# Descriptive Epidemiology and Underlying Psychiatric Disorders among Hospitalizations with Self-Directed Violence

Natalya S. Weber<sup>1\*</sup>, Jared A. Fisher<sup>1,2</sup>, David N. Cowan<sup>1,2</sup>, Teodor T. Postolache<sup>3</sup>, Raket A. Larsen<sup>1,2</sup>, David W. Niebuhr<sup>1,4</sup>

**1** Preventive Medicine Program, Walter Reed Army Institute of Research, Silver Spring, Maryland, United States of America, **2** Allied Technology Group, Inc., Rockville, Maryland, United States of America, **3** Mood and Anxiety Program, Department of Psychiatry, University of Maryland School of Medicine, Baltimore, Maryland, United States of America, **4** Department of Preventive Medicine and Biometrics, Uniformed Services University of Health Sciences, Bethesda, Maryland, United States of America

## Abstract

**Background:** Suicide claims over one million lives worldwide each year. In the United States, 1 per 10,000 persons dies from suicide every year, and these rates have remained relatively constant over the last 20 years. There are nearly 25 suicide attempts for each suicide, and previous self-directed violence is a strong predictor of death from suicide. While many studies have focused on suicides, the epidemiology of non-fatal self-directed violence is not well-defined.

**Objective:** We used a nationally representative survey to examine demographics and underlying psychiatric disorders in United States (US) hospitalizations with non-fatal self-directed violence (SDV).

**Method:** International Classification of Disease, 9<sup>th</sup> Revision (ICD-9) discharge diagnosis data from the National Hospital Discharge Survey (NHDS) were examined from 1997 to 2006 using frequency measures and adjusted logistic regression.

**Results:** The rate of discharges with SDV remained relatively stable over the study time period with 4.5 to 5.7 hospitalizations per 10,000 persons per year. Excess SDV was documented for females, adolescents, whites, and those from the Midwest or West. While females had a higher likelihood of self-poisoning, both genders had comparable proportions of hospitalizations with SDV resulting in injury. Over 86% of the records listing SDV also included psychiatric disorders, with the most frequent being affective (57.8%) and substance abuse (37.1%) disorders. The association between psychiatric disorders and self-injury was strongest for personality disorders for both males (OR = 2.1; 95% CI = 1.3–3.4) and females (OR = 3.8; 95% CI = 2.7–5.3).

**Conclusion:** The NHDS provides new insights into the demographics and psychiatric morbidity of those hospitalized with SDV. Classification of SDV as self-injury or self-poisoning provides an additional parameter useful to epidemiologic studies.

**Citation:** Weber NS, Fisher JA, Cowan DN, Postolache TT, Larsen RA, et al. (2013) Descriptive Epidemiology and Underlying Psychiatric Disorders among Hospitalizations with Self-Directed Violence. PLoS ONE 8(3): e59818. doi:10.1371/journal.pone.0059818

**Editor:** Allan Siegel, University of Medicine & Dentistry of NJ - New Jersey Medical School, United States of America

**Received:** November 30, 2012; **Accepted:** February 19, 2013; **Published:** March 26, 2013

This is an open-access article, free of all copyright, and may be freely reproduced, distributed, transmitted, modified, built upon, or otherwise used by anyone for any lawful purpose. The work is made available under the Creative Commons CC0 public domain dedication.

**Funding:** The effort is funded by the Stanley Medical Research Institute, Bethesda, MD, (CRADA# DAMD17-04-0041, <http://www.stanleyresearch.org/dnn/ResearchGrants/Overview/tabid/156/Default.aspx>) and the Department of the Army. The funders had no role in study design, data collection and analysis, decision to publish, or preparation of the manuscript.

**Competing Interests:** ATG has had a service support contract with the Walter Reed Army Institute of Research (WRAIR) for over 15 years. ATG personnel include epidemiologists and statisticians who support and collaborate with the WRAIR researchers. ATG staff are all at the master's or doctoral level of training, and they assist in the design, analysis, interpretation and presentation of studies, and in writing and publishing of manuscripts for peer-reviewed journals. There is no financial or other conflict of interest between ATG staff and any of the research with which they participate. ATG and its staff members are contractors with no vested interests in the results, conclusions, and recommendations resulting from any research and have no interests related to employment, consultancy, patents, products in development or marketed products, or any other aspect of this research. Even though Natalya S. Weber, M.D., M.P.H., is a PLOS One Editorial board member, this does not alter the authors' adherence to all the PLOS ONE policies on sharing data and materials.

\* E-mail: Natalya.Weber@us.army.mil

## Introduction

Suicide claims over one million lives worldwide each year [1]. In the United States, suicide rates have remained relatively constant over the last 20 years (1/10,000 yearly), and risk factors, such as old age, male gender, gun access, stressful life events, and substance abuse have been identified [2–6]. More than 90% of those who die by suicide have at least one diagnosed psychiatric disorder, with depression and substance abuse disorders being the

most common [7]. Among those with certain psychiatric disorders, the lifetime risk of suicide can be as high as four to seven percent, with nearly 30% attempting suicide [8,9].

There are nearly 25 suicide attempts for each suicide, and previous suicidal and non-suicidal self-directed violence is a strong predictor of death from suicide [3,10–13]. While many studies have focused on suicides, the epidemiology of non-fatal self-directed violence is not well defined. Because hospitalizations with self-directed violence are an important target population for

preventive measures, it is crucial that we understand the population and risk factors that may have contributed to their hospitalization.

## Aims of the Study

In this cross-sectional study, we examined psychiatric disorders and demographic characteristics of hospitalizations with diagnoses of non-fatal self-directed violence. An emphasis was placed on identifying risk factors for self-directed violence resulting in injury, which may reflect a higher degree of intent to die, compared to poisoning. To our knowledge, this is the first study examining psychiatric disorders and methods of non-fatal self-directed violence in a sample representative of all US hospitalizations.

## Methods

### Data Source

The National Hospital Discharge Survey (NHDS) is conducted annually by the National Center for Health Statistics [14]. It uses a stratified three-stage probability design which covers discharges from short-stay, non-institutional hospitals located in all states and the District of Columbia, USA. Primary sampling units (PSUs) consisting of counties, groups of counties, or county equivalents comprise the first stage. In stage 2, hospitals within the PSU's are selected with probabilities proportional to their yearly number of discharges. Stage 3 selects discharges by a systematic random sampling technique [15]. This enables national estimates of patients' demographic characteristics, length of stay, diagnoses, and procedural codes in hospitals located in various regions of the country [16]. The 1979–2006 multi-year public use data and documentation files have standardized coding which provide comparable data across all data years. We have limited this dataset to the last 10 years available (1997–2006) in order to minimize differences in the utilization of International Classification of Diseases, 9th Edition/Revision (ICD-9) codes over time. The Walter Reed Army Institute of Research Institutional Review Board approved this study.

### Population

Demographic characteristics and analyses are presented for the total estimated number of discharges (285 million) based on the sample of 2,516,113 weighted records. Because our study examines and compares a disease burden in the hospitalized population, the discharge records associated with normal child-birth (ICD-9 code V27) were excluded. Only those aged 6 years or older and discharged alive were included.

### Data Coding

We use the term 'self-directed violence' or 'SDV' to replace the analogous ICD-9 E95 code definition of 'suicide and self-inflicted injury.' This terminology has recently been developed by the US National Center for Injury Prevention and Control in order to promote and improve the consistency of suicidal behavior surveillance and research [17]. Because there were few ( $N = 105$ ) with SDV that were dead on admission or discharge, these hospitalizations were excluded from the study. Results are therefore presented only on those hospitalized with non-fatal SDV.

Hospitalizations with SDV were ascertained based on at least one supplementary ICD-9 code E950–E959 (suicide and self-inflicted injury) in the NHDS records, which lists between one and seven diagnoses. This section of the ICD-9 covers 'injuries in suicide and attempted suicide' and 'self-inflicted injuries specified as intentional.' SDV by poisoning was indicated by codes E950 ('solid or liquid substances'), E951 ('gases in domestic use,' e.g., gas

distributed by pipeline), or E952 ('other gases and vapors,' e.g., motor vehicle exhaust gas), while SDV resulting in injury was specified by codes E953 ('hanging, strangulation, and suffocation'), E954 ('submersion'), E955 ('firearms, air guns, and explosives'), E956 ('cutting and piercing instrument'), E957 ('jumping from high places'), or E958 ('other and unspecified means'). If a discharge record had E95 codes in both categories, the record was classified as SDV resulting in injury. Records with an ICD-9 code 290–319 in any diagnostic position were classified as having an underlying psychiatric disorder. Further classifications into general psychiatric disorders were also considered for analysis. These categories included: psychotic (ICD-9 290–295, 297–299), affective (ICD-9 296, 311), adjustment (ICD-9 309), anxiety (ICD-9 300), personality (ICD-9 301), and substance abuse disorders (ICD-9 303–305) [18].

### Statistical Analysis

The statistical analyses were performed using SAS software (version 9.2, SAS Institute Inc, Cary, NC, USA). The NHDS variable "weight" was used to provide national estimates (weighted frequencies) for demographic characteristics, region, source of payment, and length of stay for hospital discharges. Because some values for race were not recorded until beginning in 2000 and others too small to weight, we limited the reported values to 'Black,' 'White,' 'Other,' and 'Not Stated.' Ethnicity was not available. We calculated proportions (%) of discharge records with SDV among all discharges and compared them by demographic groups. Odds ratios from logistic regression with 95% confidence intervals (CI), adjusted for sex, age, race, region, and year, were used as measures of comparison and significance.

Time trends examining the counts and rates of SDV resulting in poisoning (E95.0–E95.2) or injury (E95.3–E95.8) were examined over the time period. Rates were estimated using US census data. Mean days of hospital care were also compared between discharges with indications of either injury or poisoning.

Proportions of psychiatric disorders among the hospitalized with and without SDV were calculated and compared stratified by gender. The proportion of discharge records that lists SDV resulting in injury was also presented for each grouping of psychiatric disorders. Discharges with SDV were further examined on the four and five digit ICD-9 levels to explore the most common methods of self-harm and their distribution between genders.

## Results

The NHDS sample included 10,908 records with SDV, 0.5% of all records in the sample, representative of 1.4 million total hospital SDV discharges during the study period. The proportion of discharges with SDV remained relatively stable, with 4.5 to 5.7 hospitalizations per 10,000 persons per year (Figure 1). The rate of discharges with self-poisoning was roughly four times that of SDV resulting in injury, but neither rate meaningfully changed over the time period. Mean length of stay of inpatient care among discharges with SDV also did not change substantially over the time period but did differ significantly between injury and poisoning (5.6 days for self-injuries; 2.9 days for self-poisonings,  $p < 0.001$ ).

Important differences in the risks of SDV in general and among the subset of SDV resulting in injury are presented in Tables 1 and 2. Overall, there were nearly 300,000 more discharges with SDV among females than among males, due to the higher proportion of female discharges with poisoning codes (63%) (Table 1). While males were almost twice as likely to have SDV resulting in injury

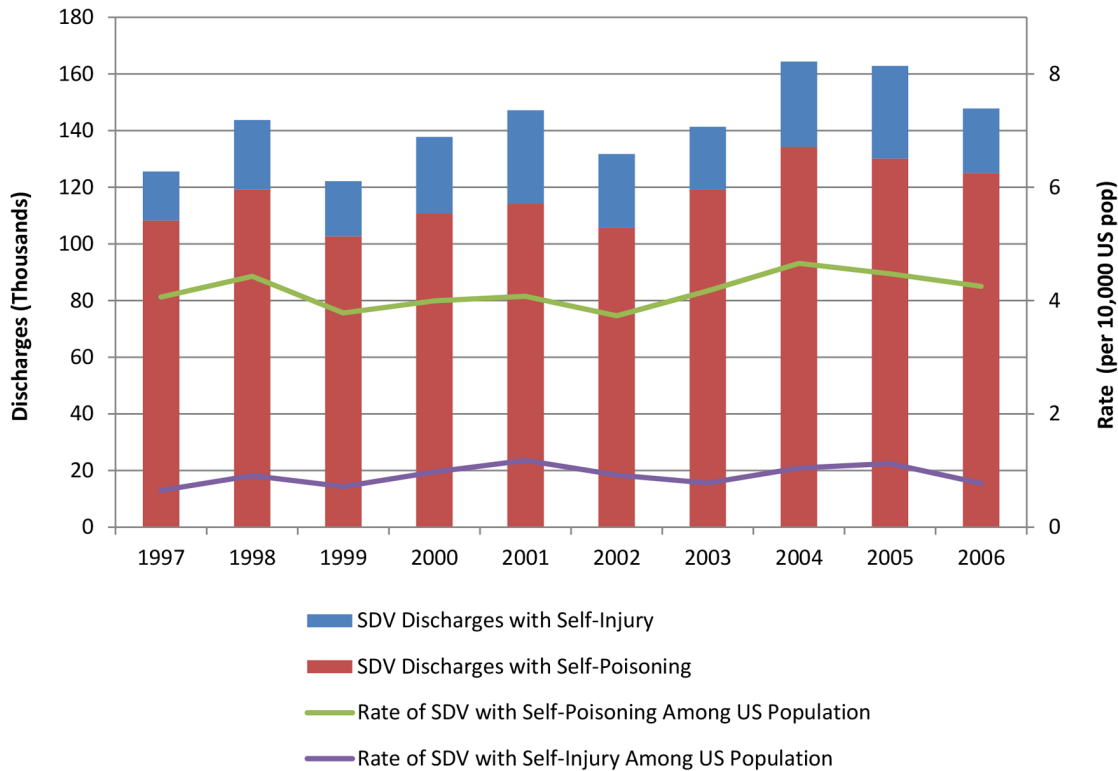

**Figure 1. Counts and rates of self-directed injury and self-directed poisoning 1997–2006.** SDV; self-directed violence. doi:10.1371/journal.pone.0059818.g001

than in poisoning ( $OR = 1.96$ ) (Table 2), there were roughly equal numbers of male and female discharges with self-directed injury. Hospitalizations with SDV were more likely to be younger individuals, especially adolescents, compared to those 65 and older. Whites were almost twice as likely as blacks to be hospitalized with SDV. The Midwest and West had higher proportions of hospitalizations with SDV.

Over 86% of the records that listed SDV also included ICD-9 codes for psychiatric disorders. The most common psychiatric disorders associated with SDV were affective disorders (57.8%) and substance abuse disorders (37.1%). Overall, there was a strong association between the co-occurrence of psychiatric disorders and suicide attempts ( $OR = 14.5$ ; 95% CI 13.2–15.9). The association was strongest for those with affective ( $OR = 10.4$ ; 95% CI 9.7–11.1) or adjustment ( $OR = 6.2$ ; 95% CI 5.6–7.0) disorders. Comorbidity differed by sex (Figure 2). The co-occurrence of substance abuse disorders ( $OR = 2.2$ ; 95% CI 1.9–2.5) or psychoses ( $OR = 1.7$ ; 95% CI 1.4–2.1) was more common in males, while females were significantly more likely to have affective ( $OR = 1.7$ ; 95% CI 1.5–1.9), adjustment ( $OR = 1.5$ ; 95% CI 1.2–1.8), or anxiety ( $OR = 1.4$ ; 95% CI 1.1–1.7) disorders. Discharge records with any psychiatric disorder category, except affective disorders, were more likely to also list SDV resulting in injury compared to self-poisoning. The association with self-injury was strongest for personality disorders compared to all other psychiatric disorders in both males ( $OR = 2.1$ ; 95% CI 1.3–3.4) and females ( $OR = 3.8$ ; 95% CI 2.7–5.3).

In all cases, ICD-9 E95 codes were detailed to the fourth or fifth digit, allowing an examination of the methods used for SDV. The majority of E95 codes indicated poisoning, most commonly by solid or liquid substances (81.5%). Among poisonings, the most frequently used substances were ‘tranquilizers and other psycho-

tropic medications’ (37.1%) followed by ‘analgesics, antipyretics, and antirheumatics’ (26.1%). Cutting and piercing (E956) was the most common E95 code classified as a self-injury (11.3%). The distribution of percentages corresponding to method of self-harm differed between males and females. The male to female ratio was largest for discharges with SDV specific to firearms or explosives ( $OR = 17.9$ ; 95% CI 7.7–41.3).

## Discussion

### Contribution to the Literature

Although data on suicides in the United States is well maintained by the National Center for Health Statistics, definitive data on non-fatal self-directed violence in general, or suicide attempts in particular, do not exist. Existing studies have primarily relied on self-reports on both national and smaller geographic scales [13,19] to capture persons with a history of suicide attempt. To our knowledge, no study focusing on the hospitalized population with SDV has been conducted. Our study examines demographic characteristics and underlying psychiatric disorders in hospitalizations with SDV requiring hospital care in a large nationally representative sample free of self-reporting bias.

### Rate and Number of SDV Discharges

According to the CDC, the twelve-month incidence of suicide attempts is about 50 per 10,000 individuals [13]. Though not including non-suicidal SDV, this estimated rate is roughly 10 times greater than our finding. This, nevertheless, seems reasonable as our population does not include those attempts where medical care was not sought or did not lead to hospitalization. Doshi et al., approximated that, of 400,000 US yearly emergency department visits with attempted suicide or self-inflicted injury, roughly one-

**Table 1.** Demographic characteristics of hospital discharges with non-fatal self-directed violence (SDV) resulting in injury or poisoning.

|               |            | Proportion of Hospital Discharges with SDV |         | SDV Discharges with Self-Injury |         | SDV Discharges with Self-Poisoning |   |
|---------------|------------|--------------------------------------------|---------|---------------------------------|---------|------------------------------------|---|
|               |            | %                                          | N       | %                               | N       | %                                  | N |
| <b>Sex</b>    | Female     | 0.54                                       | 122,330 | 47.9                            | 727,726 | 63.0                               |   |
|               | Male       | 0.44                                       | 132,852 | 52.1                            | 427,397 | 37.0                               |   |
| <b>Age</b>    | 6–12       | 0.07                                       | 2,270   | 0.9                             | 6,691   | 0.6                                |   |
|               | 13–19      | 2.78                                       | 57,229  | 22.4                            | 212,572 | 18.4                               |   |
|               | 20–40      | 1.59                                       | 125,859 | 49.3                            | 576,249 | 49.9                               |   |
|               | 41–65      | 0.43                                       | 58,772  | 23.0                            | 319,759 | 27.7                               |   |
|               | 65–99      | 0.04                                       | 11,052  | 4.3                             | 39,852  | 3.4                                |   |
| <b>Race</b>   | Black      | 0.38                                       | 17,954  | 7.0                             | 106,861 | 9.2                                |   |
|               | White      | 0.50                                       | 152,388 | 59.7                            | 745,450 | 64.6                               |   |
|               | Other      | 0.50                                       | 10,408  | 4.1                             | 42,702  | 3.7                                |   |
|               | Not Stated | 0.55                                       | 74,432  | 29.2                            | 260,110 | 22.5                               |   |
| <b>Region</b> | Northeast  | 0.39                                       | 44,559  | 17.5                            | 199,488 | 17.3                               |   |
|               | Midwest    | 0.56                                       | 76,635  | 30.0                            | 290,608 | 25.1                               |   |
|               | South      | 0.44                                       | 72,274  | 28.3                            | 394,951 | 34.2                               |   |
|               | West       | 0.69                                       | 61,714  | 24.2                            | 270,076 | 23.4                               |   |

doi:10.1371/journal.pone.0059818.t001

third result in hospital admission [20]. Our findings (of 140,000 hospitalizations per year) support this estimate and provide further insight into a population which includes those with SDV requiring hospitalization. The reasons for hospitalization include, but are not limited to, serious general medical consequences, continuous suicidal ideation, underlying psychiatric disorders requiring inpatient care, and/or the lack of adequate support and intervention efforts outside of the hospital.

### Demographics

It is important to note that the demographics of individuals who die by suicide differ dramatically from those with suicide attempts. For example, while males have a much higher suicide rate, females are at increased risk for suicide attempts. This gender difference in attempts versus suicides is one of the most widely supported findings in the epidemiology of suicidal behavior [21,22]. Though the present study concerns only suicidal and non-suicidal SDV, we

**Table 2.** Associations of demographic characteristics in hospital discharges with non-fatal self-directed violence (SDV).

|               |            | SDV vs. All Hospitalized |             | Self-Injury vs. Self-Poisoning |           |
|---------------|------------|--------------------------|-------------|--------------------------------|-----------|
|               |            | OR*                      | 95% CI      | OR*                            | 95% CI    |
| <b>Sex</b>    | Female     | REF                      |             | REF                            |           |
|               | Male       | 0.82                     | 0.77–0.88   | 1.96                           | 1.65–2.32 |
| <b>Age</b>    | 6–12       | 4.00                     | 2.66–6.02   | 1.34                           | 0.54–3.29 |
|               | 13–19      | 76.43                    | 63.06–92.64 | 1.06                           | 0.67–1.70 |
|               | 20–40      | 43.38                    | 36.05–52.19 | 0.80                           | 0.51–1.25 |
|               | 41–65      | 11.39                    | 9.42–13.77  | 0.68                           | 0.42–1.09 |
|               | > = 65     | REF                      |             | REF                            |           |
| <b>Race</b>   | Black      | REF                      |             | REF                            |           |
|               | White      | 1.82                     | 1.63–2.03   | 1.23                           | 0.92–1.66 |
|               | Other      | 1.27                     | 1.06–1.51   | 1.35                           | 0.86–2.13 |
|               | Not Stated | 1.56                     | 1.39–1.76   | 1.65                           | 1.21–2.25 |
| <b>Region</b> | South      | REF                      |             | REF                            |           |
|               | Northeast  | 0.94                     | 0.86–1.03   | 1.15                           | 0.90–1.47 |
|               | Midwest    | 1.46                     | 1.34–1.59   | 1.25                           | 0.97–1.61 |
|               | West       | 1.68                     | 1.53–1.84   | 1.15                           | 0.89–1.49 |

\*Adjusted for sex, age, race, and region.

doi:10.1371/journal.pone.0059818.t002

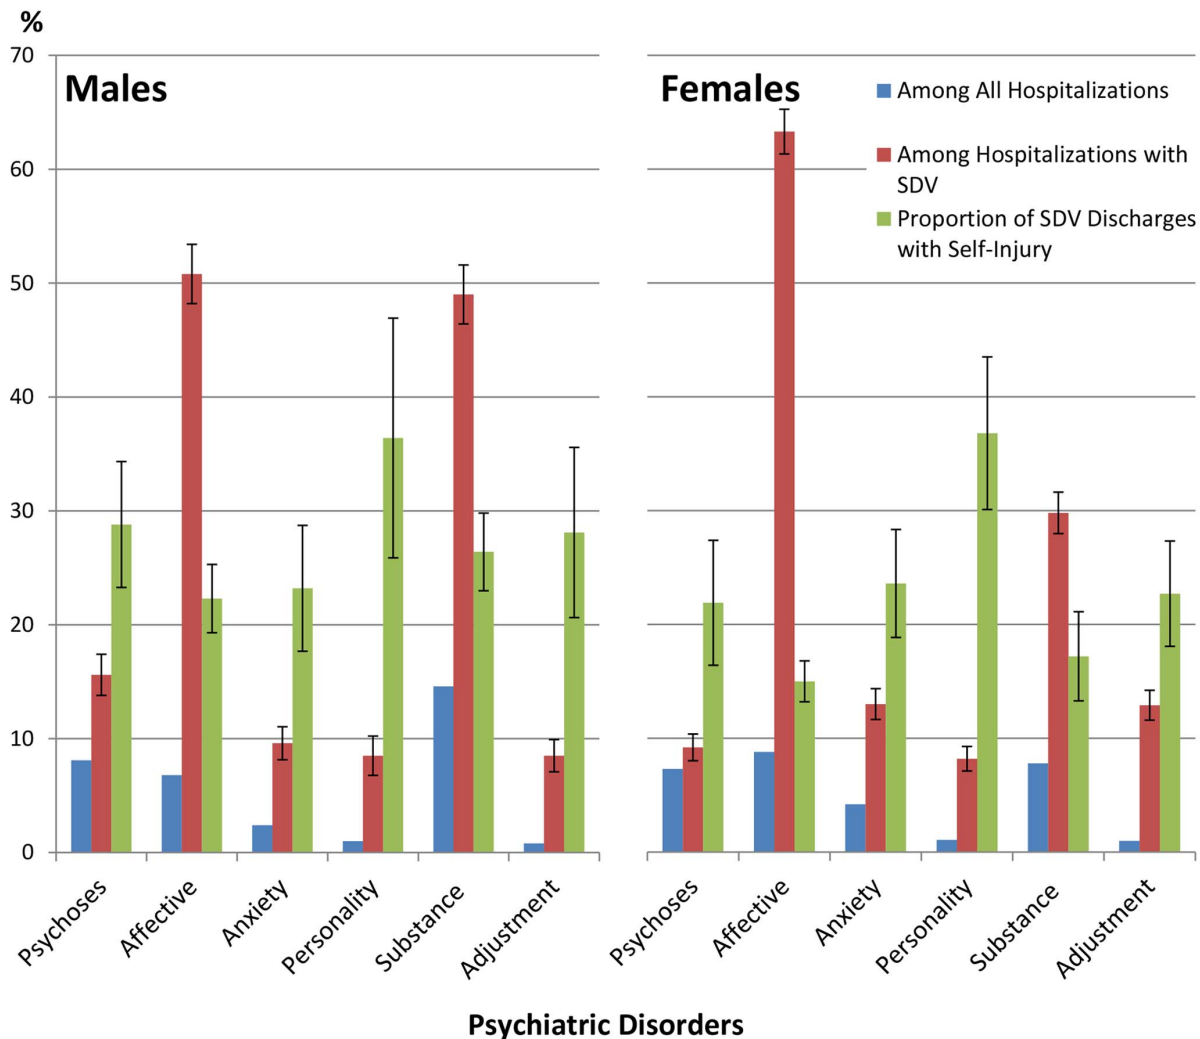

**Figure 2. Relationship between psychiatric disorders and non-fatal self-directed violence in hospital discharges.** The first two columns of each set represent the proportion of discharges with psychiatric disorders that occur among all hospitalizations or among all SDV discharges, respectively. The third column relates to the method of SDV if a discharge record has the given comorbid psychiatric disorder. The column presents the percentage of SDV discharges with self-injury as opposed to self-poisoning. Error bars are shown if the 95% CI for the weighted sample exceeds 2%.

doi:10.1371/journal.pone.0059818.g002

found that males were almost twice as likely as females to use means causing injury rather than poisoning. Though the proportions differed, there were roughly equal numbers of hospitalized males and females with self-directed injuries. Thus, it is important to keep both genders in mind when considering outreach, as individuals with self-directed injuries have a higher intent to die and a 2 to 5 fold increase in suicide risk compared to those with self-poisoning [10,23–25].

In our population the number and proportion of discharges with SDV were higher among young compared with older individuals. Adolescents are especially vulnerable to stress and depression which may lead to higher rates of suicide attempts [26] and consequent hospitalization. Non-suicidal SDV is also a relatively common phenomenon in adolescence, mainly in those with various psychopathologies, and may require hospitalization. Although non-suicidal SDV usually contains no intent to die, it is associated with subsequent suicide attempts and may suggest that these behaviors and their related psychology may be a part of the same risk trajectory [11]. Unlike among adolescents, a higher

proportion of older individuals die from suicide [27,28] and therefore are not captured in our data. The elderly have a higher lethality from suicide because they use more lethal means [29,30], more often live alone and therefore are less likely to receive prompt treatment after a suicide attempt, and their preexisting medical conditions also increase the likelihood of death [28].

### Psychiatric Comorbidity

The great majority of hospitalizations with SDV also had psychiatric disorders [2,31–34]. Consistent with the literature, the major contributor to the SDV was a mood disorder with a more pronounced effect among women.

While the presence of an affective disorder was the strongest contributor to self-poisoning, a personality disorder was the highest risk factor for self-injury among both males and females. Using means resulting in injury could be attributed to a higher level of aggressiveness and impulsivity among those with personality disorders as well as more pervasive and more resilient

psychopathology compared to persons with mood disorders [35,36].

Among psychiatric hospitalizations the proportion of those with psychoses was substantial and similar for both genders. The proportion of underlying psychosis among discharges with SDV, however, was considerably higher in men compared to women. This gender difference could be attributed to a more severe course of schizophrenia and lower level of social functioning in men [37].

### Limitations

This study was limited by the inability to differentiate between suicide attempts and non-suicidal SDV based on the ICD-9 codes due to the lack of information on suicidal intent. However, we consider it important to study and appropriate to extrapolate our findings to and compare them with the existing literature on suicide attempts because many risk factors are shared by those involved in non-fatal SDV regardless of suicidal intent [38,39]. Additionally, it is likely that many with SDV, even those that require hospital care, are missed or not coded properly by healthcare personnel [40,41] thus underrepresenting the true number of those hospitalized with SDV. In our dataset, individuals could be included more than once if they had more than one hospitalization during the sampling period, therefore all findings are presented for hospital discharges and not individual patients. Although repeated SDV is common, multiple discharge records for one individual is unlikely given that only 1% of all hospital records have been sampled by NHDS. More up-to-date data would be preferable; however, the NHDS was discontinued after 2010 and the only multiyear datasets available to us did not extend beyond 2006. Breaking down racial groups more specifically and including ethnicity was also not possible due to lack of consistency and incidence within the dataset. Our study is observational and uses cross-sectional data, so no longitudinal information is captured on repeated SDV.

### References

- Bailey RK, Patel TC, Avenido J, Patel M, Jaleel M, et al. (2011) Suicide: current trends. *J Natl Med Assoc* 103: 614–617.
- Moscicki EK (2001) Epidemiology of completed and attempted suicide: toward a framework for prevention. *Clin Neurosci Res* 1: 310–323.
- CDC. National Center for Injury Prevention and Control. (2012): Web-based Injury Statistics Query and Reporting System (WISQARS). Available: <http://www.cdc.gov/nchs/nhds.htm> Accessed 18 October 2012.
- Rich CL, Fowler RC, Fogarty LA, Young D (1988) San Diego Suicide Study. III. Relationships between diagnoses and stressors. *Arch Gen Psychiatry* 45: 589–592.
- Lubin G, Werbeloff N, Halperin D, Shmushkevitch M, Weiser M, et al. (2010) Decrease in suicide rates after a change of policy reducing access to firearms in adolescents: a naturalistic epidemiological study. *Suicide Life Threat Behav* 40: 421–424.
- Miller M, Azrael D, Hemenway D (2002) Household firearm ownership and suicide rates in the United States. *Epidemiology* 13: 517–524.
- Bertolote JM, Fleischmann A, De Leo D, Wasserman D (2004) Psychiatric diagnoses and suicide: revisiting the evidence. *Crisis* 25: 147–155.
- Inskip HM, Harris EC, Barraclough B (1998) Lifetime risk of suicide for affective disorder, alcoholism and schizophrenia. *Brit J Psychiatry* 172: 35–37.
- Novick DM, Swartz HA, Frank E (2010) Suicide attempts in bipolar I and bipolar II disorder: a review and meta-analysis of the evidence. *Bipolar Disord* 12: 1–9.
- Bergen H, Hawton K, Waters K, Ness J, Cooper J, et al. (2012) How do methods of non-fatal self-harm relate to eventual suicide? *J Affect Disord* 136: 526–533.
- Wilkinson P, Goodyer I (2011) Non-suicidal self-injury. *Eur Child Adolesc Psychiatry* 20: 103–108.
- Office of the Surgeon General (US), National Action Alliance for Suicide Prevention (US) 2012 National Strategy for Suicide Prevention: Goals and Objectives for Action: A Report of the U.S. Surgeon General and of the National Action Alliance for Suicide Prevention.
- Crosby AE, Han B, Ortega LA, Parks SE, Gfroerer J, et al. (2011) Suicidal thoughts and behaviors among adults aged  $\geq 18$  years—United States, 2008–2009. *MMWR Surveill Summ* 60: 1–22.

Some studies have broader criteria for identifying SDV to include ICD-9 codes E980–E989 (Injuries undetermined whether accidentally or purposefully inflicted) [34]. However we chose a more conservative approach and thus are more confident that all our cases presented with SDV, although, in return, we may have underestimated the frequency of SDV.

Our exploration of SDV hospitalizations resulting in either injury or poisoning is useful in understanding how SDV varies among demographic characteristics and among those with certain psychiatric disorders. This may better enable healthcare personnel to be cognizant of this high-risk population. Though demographics and characteristics of the population engaged in SDV differ in many ways, sometimes dramatically, from those that die by suicide, these persons are important as targets of intervention as they are at an increased risk for subsequent suicide.

### Acknowledgments

The authors would like to thank Walter Reed Army Institute of Research, Preventive Medicine Branch staff member Janice K. Gary, for her work in careful review and administrative support in preparation of the manuscripts.

Note the following disclaimer: This work was supported by the Stanley Medical Research Institute, Chevy Chase, MD, and the Department of the Army. The views expressed are those of the authors and should not be construed to represent the positions of the Department of the Army or Department of Defense. None of the authors have any associations, financial or otherwise, that may present a conflict of interest.

### Author Contributions

Conceived and designed the experiments: NSW DNC JAF TTP DN. Performed the experiments: NSW DNC JAF DN. Analyzed the data: NSW JAF. Contributed reagents/materials/analysis tools: NSW JAF. Wrote the paper: NSW JAF DNC DN TTP RAL.

- Centers for Disease Control and Prevention (CDC) (2012) National Hospital Discharge Survey (NHDS). Available: <http://www.cdc.gov/nchs/nhds.htm>. Accessed 19 October 2012.
- Dennison C, Pokras R (2000) Design and operation of the National Hospital Discharge Survey: 1988 redesign. *Vital Health Stat* 1.
- Thompson WW, Shay DK, Weintraub E, Brammer L, Bridges CB, et al. (2004) Influenza-associated hospitalizations in the United States. *JAMA* 292: 1333–1340.
- Crosby AE, Ortega L, Melanson C (2011) Self-directed Violence Surveillance: Uniform Definitions and Recommended Data Elements, Version 1.0. Atlanta (GA): Centers for Disease Control and Prevention, National Center for Injury Prevention and Control.
- National Center for Health Statistics (1999) Hospital and Payor International Classification of Diseases, Clinical Modification (ICD-9-CM). Medicode.
- Kausch O (2003) Suicide attempts among veterans seeking treatment for pathological gambling. *J Clin Psychiatry* 64: 1031–1038.
- Doshi A, Boudreaux ED, Wang N, Pelletier AJ, Camargo CA, Jr. (2005) National study of US emergency department visits for attempted suicide and self-inflicted injury, 1997–2001. *Ann Emerg Med* 46: 369–375.
- Mann JJ (2002) A current perspective of suicide and attempted suicide. *Ann Intern Med* 136: 302–311.
- Moscicki EK (1994) Gender differences in completed and attempted suicides. *Ann Epidemiol* 4: 152–158.
- Haw C, Hawton K, Houston K, Townsend E (2003) Correlates of relative lethality and suicidal intent among deliberate self-harm patients. *Suicide Life Threat Behav* 33: 353–364.
- Nimeus A, Alsen M, Traskman-Bendz L (2002) High suicidal intent scores indicate future suicide. *Arch Suicide Res* 6: 211–219.
- Harriss L, Hawton K, Zahl D (2005) Value of measuring suicidal intent in the assessment of people attending hospital following self-poisoning or self-injury. *Br J Psychiatry* 186: 60–66.
- Meehan PJ, Lamb JA, Saltzman LE, O'Carroll PW (1992) Attempted suicide among young adults: progress toward a meaningful estimate of prevalence. *Am J Psychiatry* 149: 41–44.

27. De Leo D, Padoani W, Scocco P, Lie D, Bille-Brahe U, et al. (2001) Attempted and completed suicide in older subjects: results from the WHO/EURO Multicentre Study of Suicidal Behaviour. *Int J Geriatr Psychiatry* 16: 300–310.
28. Dombrovski AY, Szanto K, Duberstein P, Conner KR, Houck PR, et al. (2008) Sex differences in correlates of suicide attempt lethality in late life. *Am J Geriatr Psychiatry* 16: 905–913.
29. Caine ED, Conwell Y (2001) Suicide in the elderly. *Int Clin Psychopharmacol* 16: S25–30.
30. Zanni GR, Wick JY (2010) Understanding suicide in the elderly. *Consul Pharm* 25: 93–102.
31. Runeson B (1989) Mental disorder in youth suicide. *DSM-III-R Axes I and II. Acta Psychiatr Scand* 79: 490–497.
32. Bolton JM, Robinson J (2010) Population-attributable fractions of Axis I and Axis II mental disorders for suicide attempts: findings from a representative sample of the adult, noninstitutionalized US population. *Am J Public Health* 100: 2473–2480.
33. Houston K, Hawton K, Shepperd R (2001) Suicide in young people aged 15–24: a psychological autopsy study. *J Affect Disord* 63: 159–170.
34. Lundin A, Lundberg I, Allebeck P, Hemmingsson T (2011) Psychiatric diagnosis in late adolescence and long-term risk of suicide and suicide attempt. *Acta Psychiatr Scand* 124: 454–461.
35. Gabbard GO (2000) Psychotherapy of personality disorders. *J Psychother Pract Res* 9: 1–6.
36. Goodman M, New A (2000) Impulsive aggression in borderline personality disorder. *Curr Psychiatry Rep* 2: 56–61.
37. Diagnostic and Statistical Manual of Mental Disorders (2000) Fourth Edition, American Psychiatric Association, Washington, DC. 385–360.
38. Cooper J, Kapur N, Webb R, Lawlor M, Guthrie E, et al. (2005) Suicide after deliberate self-harm: a 4-year cohort study. *Am J Psychiatry* 162: 297–303.
39. Fliege H, Lee JR, Grimm A, Klapp BF (2009) Risk factors and correlates of deliberate self-harm behavior: a systematic review. *J Psychosom Res* 66: 477–493.
40. Rhodes AE, Links PS, Streiner DL, Dawe I, Cass D, et al. (2002) Do hospital E-codes consistently capture suicidal behaviour? *Chronic Dis Can* 23: 139–145.
41. Patrick AR, Miller M, Barber CW, Wang PS, Canning CF, et al. (2010) Identification of hospitalizations for intentional self-harm when E-codes are incompletely recorded. *Pharmacoeconom Drug Saf* 19: 1263–1275.
